# Supplementary material for: Construction of MnO2–Mn3O4 heterostructures to facilitate high-performance aqueous magnesium ion energy storage
Source: Royal Society of Chemistry journal article supplement (doi:10.1039/d3cc06199j), 2024-01-01
Supplement: d3cc06199j1.pdf [file d3cc06199j1.pdf]

## 1 **Materials Characterization**

2 Field emission scanning electron microscopy (SEM, Hitachi, S-4800) with energy  
3 dispersive spectrometer (EDS, Bruker Quantax-400) and transmission electron  
4 microscope (TEM, JEM-2100F, JEOL) were used to examine the morphology,  
5 structure, and element distribution of the materials. Measurements of the sample's  
6 microstructure was made using an X-ray diffractometer (XRD, Rigaku Smart Lab, TM  
7 9kW, Cu-K,  $\lambda = 1.5418\text{\AA}$ , 30 kV, 25 mA, scanning range 5-90°). Measurements of the  
8 sample's specific surface area and pore distribution were made using a physical  
9 adsorption instrument (Micrometric, ASAP2020). In order to suit the XPS test results,  
10 XPS Peak 4.1 software was used to assess the material element composition and  
11 valence states using X-ray photoelectron spectroscopy (XPS, Esca lab 250Xi).

## 12 **Electrochemical Measurements.**

13 The electrochemical characteristics of the samples were measured using an  
14 apparatus with three electrodes. The working electrodes were prepared by coating a  
15 homogenous slurry of active material (AC, MnO<sub>2</sub>, MnO<sub>2</sub>-Mn<sub>3</sub>O<sub>4</sub>, Mn<sub>3</sub>O<sub>4</sub> power),  
16 carbon black (Super-P) and polyvinylidene fluoride (adhesive agent) in N-methyl  
17 pyrrolidone solvent with a weight ratio of 80: 10: 10 onto graphite substrates, and then  
18 dried at 60 °C for 24 h in a constant temperature oven. A saturated calomel electrode  
19 served as the reference electrode, and a Pt sheet served as the counter electrode.  
20 Typically, each working electrode has an exposed area of 1 × 1 cm<sup>2</sup> and an active  
21 material mass loading of 1 mg. As the electrolyte solution, we utilized 1.0 M MgSO<sub>4</sub>  
22 solution. An electrochemical workstation was used to measure cyclic voltammetry  
23 (CV), galvanostatic charge-discharge curves (GCD), and electrochemical impedance  
24 spectroscopy (EIS) (Autolab PGSTA302N). The voltage range for CV is -0.5 to 1.2 V  
25 (versus Hg/HgO), and the scan rates range from 2 to 10 mV s<sup>-1</sup>. The voltage range for  
26 GCD is -0.5 to 1.2 V (versus Hg/HgO), and the current density ranges from 0.2 to 5 A  
27 g<sup>-1</sup>. The frequency range used for the electrochemical impedance spectroscopy was 1  
28 MHz to 0.1 Hz. A two-electrode system (MHS) was assembled using the AC electrode  
29 as the anode and the MnO<sub>2</sub>-Mn<sub>3</sub>O<sub>4</sub> electrode as the cathode in a 1 M MgSO<sub>4</sub> aqueous  
30 electrolyte. Similarly, the electrochemical performance of MHS was tested using an

1 electrochemical workstation (Autolab PGSTA302N). The cycling stability  
2 measurement of aqueous magnesium-ion hybrid supercapacitors (MHS) was carried  
3 out on a LAND battery-testing instrument with a current density at 10 A g<sup>-1</sup> for 5000  
4 cycles. The two-electrode test employed the principle of excess negative mass for  
5 electrode matching. A single negative electrode was coated with approximately 9 mg  
6 of active material, while a single positive electrode was coated with approximately 3  
7 mg of active material. This ensured maximum capacity of the positive material. The  
8 active substance mass was used to compute all working current densities.

9

10 **Related calculations.** For the three-electrode and two-electrode systems, the specific  
11 capacitance ( $C_{F1}$ , F g<sup>-1</sup>;  $C_{F2}$ , F g<sup>-1</sup>) was calculated from the GCD curves according to  
12 the following equation[1, 2]:

$$13 \quad C_{F1} = \frac{I \times \Delta t}{m \times \Delta V}$$

$$14 \quad C_{F2} = \frac{I \times \Delta t}{m \times \Delta V}$$

15 where I,  $\Delta V$ , m and t refer to the current (A), potential window (V), mass of active  
16 material (g) and discharge time (s), respectively.

17 For the two-electrode system, the energy density (E, Wh Kg<sup>-1</sup>) and power density  
18 (P, W Kg<sup>-1</sup>) were calculated according to the following equations[3, 4]:

$$19 \quad E = \frac{C_F \times \Delta V^2}{2 \times 3.6}$$

$$20 \quad P = \frac{3600 \times E}{\Delta t}$$

21 where  $C_F$ ,  $\Delta V$ , and  $\Delta t$  refer to the specific capacitance (F g<sup>-1</sup>), potential window (V),  
22 and discharge time (s), respectively.

23 The ratio of diffusion and capacitance contributions in the capacity contribution  
24 is calculated as follows based on the ratio of diffusion-controlled and capacitance-  
25 controlled currents[5]:

$$26 \quad i = k_1 v + k_2 v^{1/2}$$

27  $k_1$  and  $k_2$  are fitting constants, vary with the scan rate of  $v$  (mV s<sup>-1</sup>),  $k_1 v$  being the faster  
28 capacitance control current and  $k_2 v^{1/2}$  being the slow diffusion control current.

## 1 **The preparation of samples.**

2        4 mmol  $\text{KMnO}_4$  and 6 mmol  $\text{MnSO}_4 \cdot \text{H}_2\text{O}$  were dissolved in 40 mL of DI,  
3 respectively. Then, the above two were mixed and stirred magnetically at room  
4 temperature for 30 min, and the mixed solution was transferred to a 100 ml  
5 polytetrafluoroethylene autoclave and kept at 140 °C for 6 h. The sample obtained by  
6 washing and drying is the precursor, and was denoted as  $\text{MnO}_2$ . The  $\text{MnO}_2$  was  
7 transferred to a tube furnace and heated at 800 °C for 2 h under  $\text{N}_2$  atmosphere at a rate  
8 of 2 °C  $\text{min}^{-1}$ . After natural cooling to room temperature, the sample was taken out and  
9 the  $\text{MnO}_2$ - $\text{Mn}_3\text{O}_4$  was obtained. Samples obtained under the same conditions at 1000  
10 °C were  $\text{Mn}_3\text{O}_4$ .

11

12

1

2 **M1:**

3

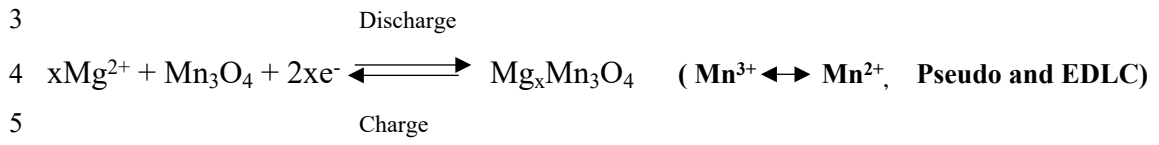

5

6

7 **M2:**

8

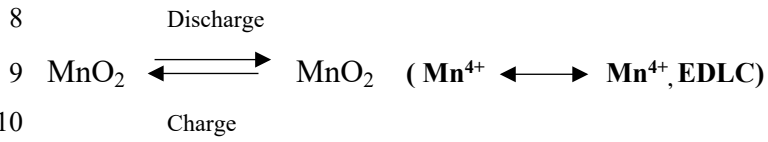

10

11

12

1 Table S1 Mn and O species content (at%) of MnO<sub>2</sub>, MnO<sub>2</sub>-Mn<sub>3</sub>O<sub>4</sub> and Mn<sub>3</sub>O<sub>4</sub> based on  
 2 XPS results.

| Sample                                            | Mn <sup>2+</sup> | Mn <sup>3+</sup> | Mn <sup>4+</sup> | O <sub>Mn-O-Mn</sub> | O <sub>Mn-OH</sub> | O <sub>H-O-H</sub> |
|---------------------------------------------------|------------------|------------------|------------------|----------------------|--------------------|--------------------|
| MnO <sub>2</sub>                                  | -                | -                | 100%             | 44.0%                | 35.2%              | 20.8%              |
| MnO <sub>2</sub> - Mn <sub>3</sub> O <sub>4</sub> | 26.7%            | 36.5%            | 36.8%            | 55.8%                | 36.0%              | 8.2%               |
| Mn <sub>3</sub> O <sub>4</sub>                    | 44.86%           | 55.14%           | -                | 64.1%                | 19.6%              | 16.3%              |

3

4

5

6

7

8

9

10

11

12

13

14 Table S2 Specific capacitance at varied current densities of MnO<sub>2</sub>, MnO<sub>2</sub>-Mn<sub>3</sub>O<sub>4</sub> and  
 15 Mn<sub>3</sub>O<sub>4</sub>.

| Sample                                            | 0.5 A g <sup>-1</sup> | 1.0 A g <sup>-1</sup> | 2.0 A g <sup>-1</sup> | 3.0 A g <sup>-1</sup> | 5.0 A g <sup>-1</sup> |
|---------------------------------------------------|-----------------------|-----------------------|-----------------------|-----------------------|-----------------------|
| MnO <sub>2</sub>                                  | 132.1                 | 108.8                 | 76.4                  | 55.6                  | 32.4                  |
| MnO <sub>2</sub> - Mn <sub>3</sub> O <sub>4</sub> | 333.5                 | 313.5                 | 277.6                 | 254.1                 | 211.8                 |
| Mn <sub>3</sub> O <sub>4</sub>                    | 155.0                 | 123.5                 | 78.8                  | 52.9                  | 29.4                  |

16

17

1 Table S3 Performance comparison of MnO<sub>2</sub>-Mn<sub>3</sub>O<sub>4</sub> with other Mn-based materials in  
 2 aqueous magnesium ion energy storage.

| Anode                            | Cathode                                            | Electrolyte                                   | Energy density<br>(W h kg <sup>-1</sup> ) | Power density<br>(W kg <sup>-1</sup> ) | Cycling                   | Ref.                 |
|----------------------------------|----------------------------------------------------|-----------------------------------------------|-------------------------------------------|----------------------------------------|---------------------------|----------------------|
| AC                               | K-MnO <sub>2</sub>                                 | 1.0 M MgSO <sub>4</sub>                       | 85.2                                      | 360                                    | 96.7%, 20000 cycles       | [5]                  |
| AC                               | Co-MnO <sub>2</sub>                                | 1.0 M MgSO <sub>4</sub>                       | 79.6                                      | 360                                    | 94.8%, 15000 cycles       | [6]                  |
| AC                               | Mg-OMS-2/Graphene                                  | 0.5 M Mg (NO <sub>3</sub> ) <sub>2</sub>      | 46.9                                      | -                                      | 75.7%, 300 cycles         | [7]                  |
| AC                               | β-MnO <sub>2</sub>                                 | 1.0 M MgSO <sub>4</sub>                       | 60.8                                      | 180                                    | 74.1%, 3500 cycles        | [8]                  |
| AC                               | δ-MnO <sub>2</sub>                                 | 4.0 M Mg (ClO <sub>4</sub> ) <sub>2</sub>     | 103.9                                     | 3680                                   | 96.5%, 1000 cycles        | [9]                  |
| PCS                              | CMO/G-N                                            | 1.0 M Mg (ClO <sub>4</sub> ) <sub>2</sub>     | 61.0                                      | 123                                    | 87%, 10000 cycles         | [10]                 |
| AC                               | δ-MnO <sub>2</sub>                                 | 4 M Mg (ClO <sub>4</sub> ) <sub>2</sub> -PAAm | 59.6                                      | 3450                                   | 96.7%, 1000 cycles        | [11]                 |
| α-Fe <sub>2</sub> O <sub>3</sub> | β-MnO <sub>2</sub>                                 | 1.0 M MgSO <sub>4</sub>                       | 82.1                                      | 6153                                   | 96.2%, 5000 cycles        | [12]                 |
| AC                               | Mn <sub>3</sub> O <sub>4</sub>                     | 2.0 M MgSO <sub>4</sub>                       | 20.2                                      | 125                                    | 80%, 6000 cycles          | [13]                 |
| AC                               | K- MnO <sub>2</sub> /HMC                           | 1.0 M MgSO <sub>4</sub>                       | 111.1                                     | 505                                    | 97.3%, 5000 cycles        | [14]                 |
| AC                               | <b>MnO<sub>2</sub>-Mn<sub>3</sub>O<sub>4</sub></b> | <b>1.0 M MgSO<sub>4</sub></b>                 | <b>185.6</b>                              | <b>1299.9</b>                          | <b>98.5%, 5000 cycles</b> | <b>This<br/>Work</b> |

3

4

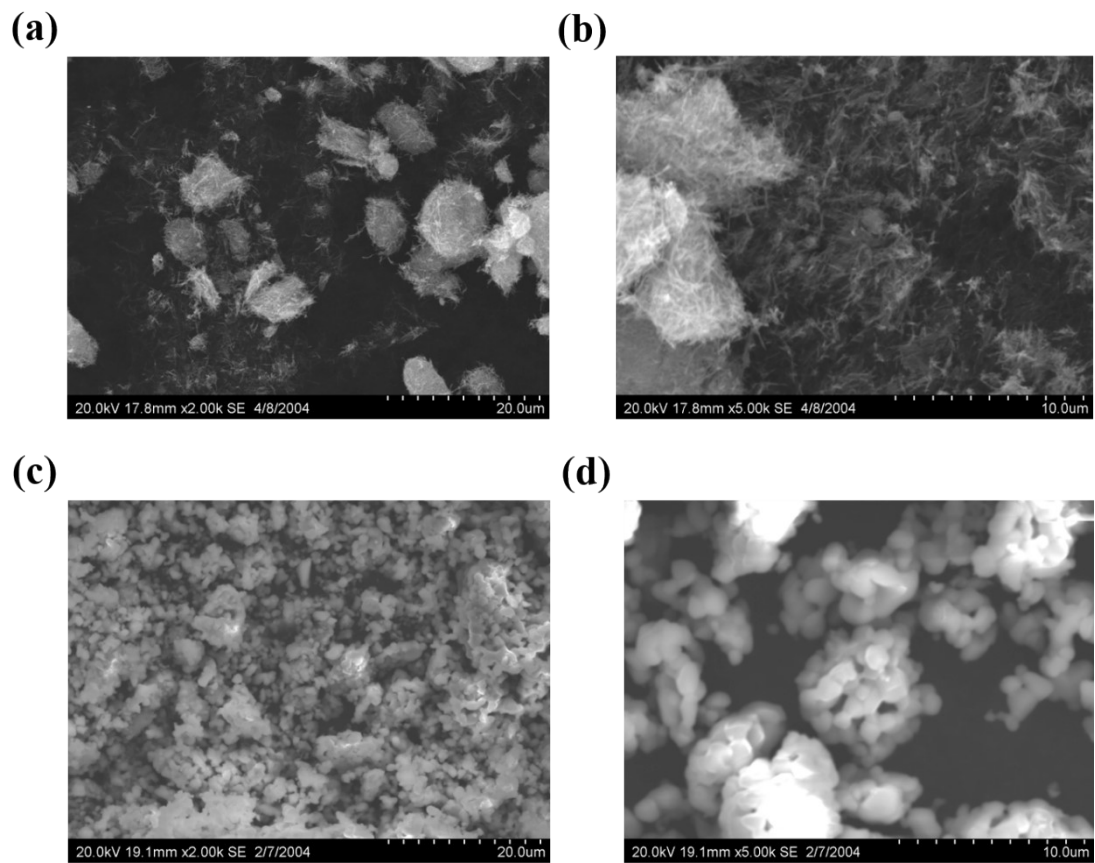

1

2

3

Fig.S1 SEM of MnO<sub>2</sub> (a, b) and Mn<sub>3</sub>O<sub>4</sub> (c, d).



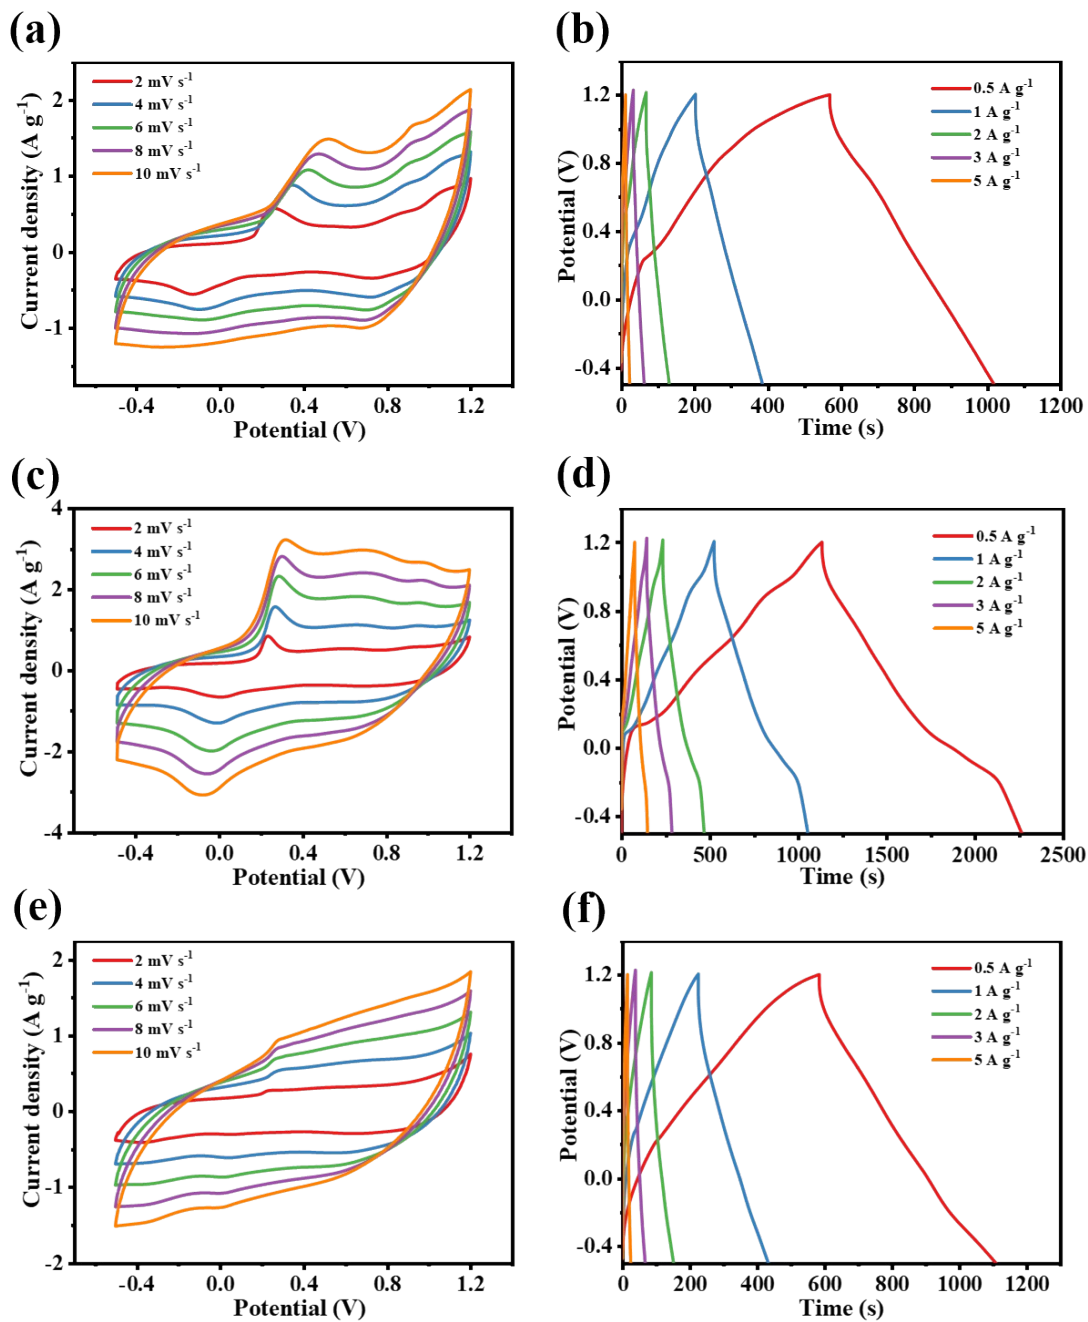

1

2 Fig.S2 CV curves at varied scan rates and GCD curves at varied current density of

3  $\text{MnO}_2$  (a, b),  $\text{MnO}_2\text{-Mn}_3\text{O}_4$  (c, d) and  $\text{Mn}_3\text{O}_4$  (e, f).

4

5

6

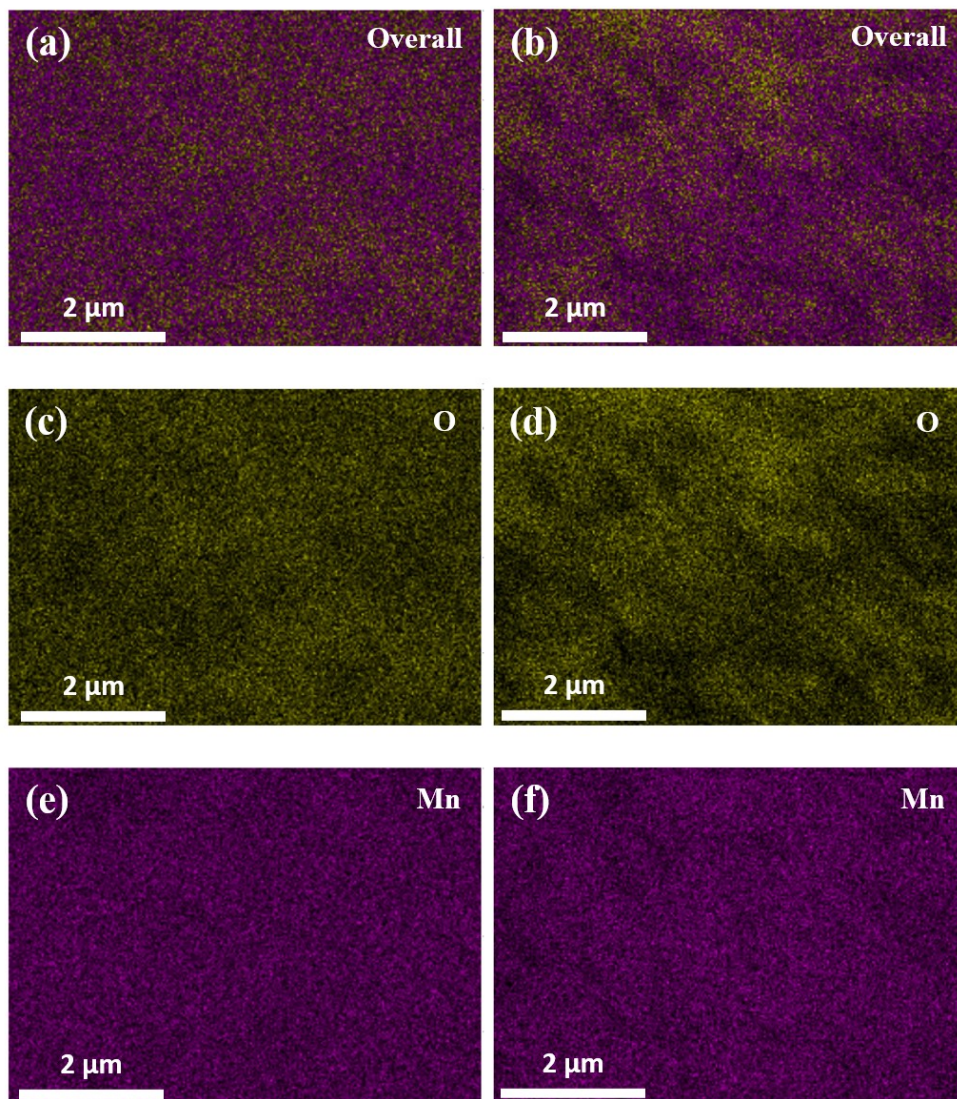

1  
2  
3  
4  
5

Fig.S3 EDS mapping of MnO<sub>2</sub> (a, c and e) and MnO<sub>2</sub>-Mn<sub>3</sub>O<sub>4</sub> (b, d and f).

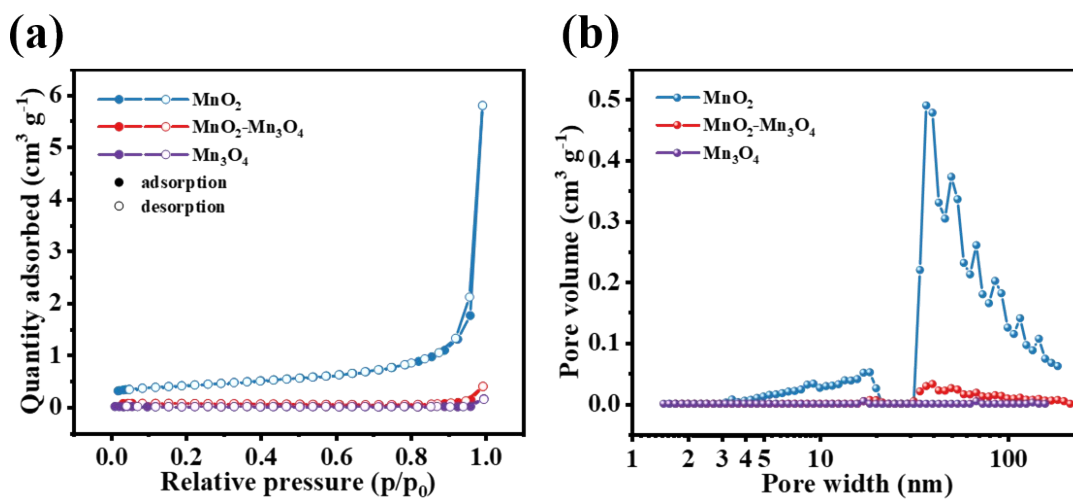

1

2 Fig.S4 (a) N<sub>2</sub> adsorption/desorption isotherms and (b) pore size distribution of the  
 3 MnO<sub>2</sub>, MnO<sub>2</sub>-Mn<sub>3</sub>O<sub>4</sub> and Mn<sub>3</sub>O<sub>4</sub>.

4

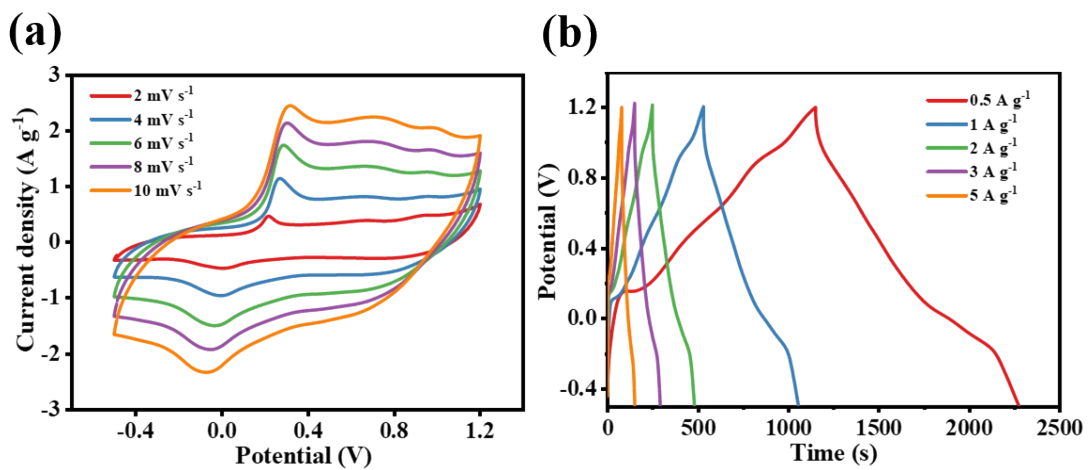

Fig.S5 Repeat experiments CV and GCD for MnO<sub>2</sub>-Mn<sub>3</sub>O<sub>4</sub> samples.

1  
2  
3

## 1 Reference

- 2 [1] L. Xu, D. Zhu, W. Zhou, F. Jiang, Y. Wu, Y. Cai, H. Kang, J. Xu, One-step  
3 hydrothermal synthesis of N-doped graphene/poly5-hydroxyindole composite  
4 materials for supercapacitor with ultra-long cycle stability and ultra-high energy storage  
5 performance. *Journal of Energy Storage*, 43 (2021) 103303.
- 6 [2] J. Zhang, L. Zhu, H. Jia, K. Wei, L. Wen, Microreactor facilitated preparation and  
7 Ni-doping of MnO<sub>2</sub> nanoparticles for supercapacitors. *Journal of Alloys and*  
8 *Compounds*, 889 (2021) 161772.
- 9 [3] X. Fan, L. Chen, X. Ji, T. Deng, S. Hou, J. Chen, J. Zheng, F. Wang, J. Jiang, K.  
10 Xu, C. Wang, Highly Fluorinated Interphases Enable High-Voltage Li-Metal Batteries.  
11 *Chem*, 4 (2018) 174-185.
- 12 [4] N. Zarshad, A.U. Rahman, J. Wu, A. Ali, F. Raziq, L. Han, P. Wang, G. Li, H. Ni,  
13 Enhanced energy density and wide potential window for K incorporated MnO<sub>2</sub>@carbon  
14 cloth supercapacitor. *Chemical Engineering Journal*, 415 (2021) 128967.
- 15 [5] L. Xu, G. Pan, J. Wang, J. Li, Z. Gong, T. Lu, L. Pan, K<sup>+</sup> intercalated MnO<sub>2</sub> with  
16 ultra-long cycling life for high-performance aqueous magnesium-ion hybrid  
17 supercapacitors. *Sustainable Energy & Fuels*, 6 (2022) 5290-5299.
- 18 [6] L. Xu, G. Pan, C. Yu, J. Li, Z. Gong, T. Lu, L. Pan, Co-doped MnO<sub>2</sub> with abundant  
19 oxygen vacancies as a cathode for superior aqueous magnesium ion storage. *Inorganic*  
20 *Chemistry Frontiers*, 10 (2023) 1748-1757.
- 21 [7] H. Zhang, K. Ye, K. Zhu, R. Cang, X. Wang, G. Wang, D. Cao, Assembly of  
22 Aqueous Rechargeable Magnesium Ions Battery Capacitor: The Nanowire Mg-OMS-  
23 2/Graphene as Cathode and Activated Carbon as Anode. *ACS Sustainable Chemistry*  
24 *& Engineering*, 5 (2017) 6727-6735.
- 25 [8] S. Li, J.-G. Zhang, Y.-Y. Yan, L.-L. Yu, J.-T. Zhao, Manganese valence state  
26 regulated beta-manganese dioxide porous nanoflowers as high-performance cathodes  
27 at large current densities for aqueous magnesium ions battery capacitor. *Journal of*  
28 *Energy Storage*, 59 (2023) 106456.
- 29 [9] G. Yang, G. Qu, C. Fang, J. Deng, X. Xu, Y. Xie, T. Sun, Y. Zhu, J. Zheng, H.  
30 Zhou, An aqueous magnesium-ion hybrid supercapacitor operated at -50 °C. *Green*  
31 *Energy & Environment*, (2022) <https://doi.org/10.1016/j.gee.2022.09.004>.
- 32 [10] S. Alagar, S. Kumari, D. Upreti, Aashi, V. Bagchi, High-Performance Mg-Ion  
33 Supercapacitor Designed with a N-Doped Graphene Wrapped CoMn<sub>2</sub>O<sub>4</sub> and Porous  
34 Carbon Spheres. *Energy & Fuels*, 36 (2022) 14442-14452.
- 35 [11] G. Qu, G. Yang, C. Fang, H. Zhou, in: 2022 IEEE International Flexible  
36 Electronics Technology Conference (IFETC), 2022, pp. 1-2.
- 37 [12] N.S. Shaikh, S.S. Mali, J.V. Patil, A.I. Mujawar, J.S. Shaikh, S.C. Pathan, S.  
38 Praserthdam, C.K. Hong, P. Kanjanaboos, Mg<sup>2+</sup> ion-powered hybrid supercapacitor  
39 with β-MnO<sub>2</sub> as a cathode and α-Fe<sub>2</sub>O<sub>3</sub> as an anode. *Journal of Energy Storage*, 50  
40 (2022) 104525.
- 41 [13] X. Cao, L. Wang, J. Chen, J. Zheng, Low-Cost Aqueous Magnesium-Ion Battery  
42 Capacitor with Commercial Mn<sub>3</sub>O<sub>4</sub> and Activated Carbon. *ChemElectroChem*, 5  
43 (2018) 2789-2794.
- 44 [14] X. Chen, L. Han, Y. Li, G. Zhao, G. Gao, L. Yu, X. Shan, X. Xie, X. Liu, G. Zhu,

1 K-birnessite-MnO<sub>2</sub>/hollow mulberry-like carbon complexes with stabilized and  
2 superior rate performance for aqueous magnesium ion storage. Dalton Trans, 53 (2024)  
3 1640-1647.  
4
